# Supplementary material for: A Rapid, Fluorescence Switch-On Biosensor for Early Diagnosis of Sorghum Mosaic Virus
Source: MDPI journal article supplement (doi:10.3390/bios12111034), 2022-11-17
Supplement: s1 [file s1]

# A Rapid, Fluorescence Switch-On Biosensor for Early Diagnosis of Sorghum Mosaic Virus

Zhenlong Han <sup>1</sup>, Congyuan Yang <sup>1</sup>, Dan Xiao <sup>2</sup>, Yinfu Lin <sup>2</sup>, Ronghui Wen <sup>2</sup>, Baoshan Chen <sup>3,4</sup> and Xipu He <sup>1,4,\*</sup>

<sup>1</sup> School of Chemistry and Chemical Engineering, Guangxi University, Nanning 530004, China

<sup>2</sup> College of Life Science and Technology, Guangxi University, Nanning 530004, China

<sup>3</sup> College of Agriculture, Guangxi University, Nanning 530004, China

<sup>4</sup> Guangxi Key Laboratory of Sugarcane Biology, Guangxi University, Nanning 530004, China

\* Correspondence: hexipu@gxu.edu.cn

**Table S1.** Comparison of the developed biosensor with previously reported methods for pathogenic factor detection.

| Target                          | Linear Range ( $\mu\text{M}$ ) | LOD ( $\mu\text{M}$ ) | Correlation Coefficient | Reference |
|---------------------------------|--------------------------------|-----------------------|-------------------------|-----------|
| Citrus tristeza virus           | Not reported                   | $5.2 \times 10^{-3}$  | 0.98                    | [31]      |
| Aflatoxin B1                    | $0.1 - 0.6 \times 10^{-3}$     | $2 \times 10^{-5}$    | Not reported            | [33]      |
| Ganoderma boninense             | Not reported                   | $3.55 \times 10^{-3}$ | 0.935                   | [38]      |
| Helicobacter pylori             | 0.01 – 0.2                     | $4.5 \times 10^{-3}$  | Not reported            | [27]      |
| Infectious bursal disease virus | 0 – 0.6                        | $3 \times 10^{-2}$    | Not reported            | [10]      |
| Staphylococcus aureus           | Not reported                   | $1 \times 10^{-3}$    | Not reported            | [39]      |
| Sorghum mosaic virus            | 0.10 – 0.54                    | $4.4 \times 10^{-2}$  | 0.99                    | This work |
